# Supplementary material for: Metabolic Overlap in Environmentally Diverse Microbial Communities
Source: Front Genet. 2019 Oct 17;10:989. doi: 10.3389/fgene.2019.00989 (PMC6811665; doi:10.3389/fgene.2019.00989)
Supplement: Supplemental Table 1 — Multiple comparisons for differences in median MO for each ecosystem. [file DataSheet_1.xlsx]

## Sheet: T1.Number of MAGs
	Number of studies	Number of MAGs
Animal	121	1814
Brackish	13	62
Built	358	1187
Engineered	99	1354
Extreme	32	144
Fresh Water	40	212
Marine	251	1751
Plant	3	16
Soil	45	187
Total	962	6727

## Sheet: STable1_MO_Dunn
Comparison	Z	P.unadj	P.adj
Engineered - Marine	-6.30117	2.95409e-10	1.06347e-08
Engineered - Fresh Water	-5.36685	8.01248e-08	2.80437e-06
Marine - Soil	5.08149	3.74495e-07	1.27328e-05
Fresh Water - Soil	4.96778	6.77253e-07	2.23493e-05
Built - Marine	-4.69078	2.72169e-06	8.70942e-05
Built - Fresh Water	-3.84364	0.000121221	0.00375785
Engineered - Extreme	-3.56604	0.000362413	0.0108724
Extreme - Soil	3.46602	0.000528231	0.0153187
Built - Engineered	3.20542	0.00134864	0.0377618
Animal - Fresh Water	-3.18617	0.00144172	0.0389265
Brackish - Soil	3.14274	0.00167376	0.0435178
Animal - Engineered	3.11753	0.00182374	0.0455934
Brackish - Engineered	3.09079	0.00199622	0.0479092
Animal - Marine	-2.96458	0.003031	0.069713
Animal - Soil	2.86044	0.0042305	0.093071
Built - Soil	2.78728	0.00531531	0.111621
Engineered - Plant	-0.0997634	0.920532	0.920532
Animal - Brackish	-1.66292	0.0963287	1
Animal - Built	0.555171	0.578778	1
Brackish - Built	1.92841	0.0538037	1
Animal - Extreme	-1.50771	0.131628	1
Brackish - Extreme	0.564057	0.572716	1
Built - Extreme	-1.94514	0.0517578	1
Brackish - Fresh Water	-0.302493	0.762276	1
Extreme - Fresh Water	-1.18939	0.234286	1
Brackish - Marine	0.542004	0.587816	1
Extreme - Marine	-0.166154	0.868035	1
Fresh Water - Marine	1.47055	0.141413	1
Animal - Plant	0.631545	0.527684	1
Brackish - Plant	1.33478	0.18195	1
Built - Plant	0.5353	0.592442	1
Extreme - Plant	1.10867	0.267572	1
Fresh Water - Plant	1.58954	0.111939	1
Marine - Plant	1.20619	0.227744	1
Engineered - Soil	0.442928	0.657818	1
Plant - Soil	0.23406	0.814939	1

## Sheet: STable2_KW_subs
Subsystem	Chi-sq	p-value
Amino acid	323.486	4.09551e-65
Aromatic compound	161.149	9.19552e-31
Carbohydrates	173.325	2.59058e-33
Cofactors	384.677	3.54276e-78
Fatty Acids	163.475	2.99913e-31
Nitrogen	200.223	5.73387e-39
Nucleosides	199.86	6.83754e-39
Nucleotide sugars	120.332	2.8311e-22
Phosphorus	68.2208	1.10986e-11
Protein	422.252	3.24144e-86
Respiration	285.289	5.54821e-57
Secondary Metabolism	147.266	7.28617e-28
Sulfur	445.654	3.15629e-91

## Sheet: STable3_AminoAcid_Dunn
Comparison	Z	P.unadj	P.adj
Animal - Brackish	-4.55494	5.24015e-06	0.000120523
Animal - Built	-8.75565	2.02928e-18	6.4937e-17
Brackish - Built	1.42619	0.153814	1
Animal - Engineered	-1.64228	0.100533	1
Brackish - Engineered	3.73523	0.000187546	0.00393847
Built - Engineered	6.07392	1.24826e-09	3.37031e-08
Animal - Extreme	-9.2577	2.08887e-20	7.10214e-19
Brackish - Extreme	-1.55967	0.118837	1
Built - Extreme	-4.96074	7.02248e-07	1.6854e-05
Engineered - Extreme	-7.91392	2.49406e-15	7.48218e-14
Animal - Fresh Water	-9.08167	1.06921e-19	3.52839e-18
Brackish - Fresh Water	-1.03144	0.302335	1
Built - Fresh Water	-4.38853	1.14118e-05	0.000251059
Engineered - Fresh Water	-7.60735	2.79764e-14	8.11316e-13
Extreme - Fresh Water	0.774463	0.438657	1
Animal - Marine	-14.3846	6.46575e-47	2.32767e-45
Brackish - Marine	-0.97977	0.3272	1
Built - Marine	-8.18254	2.7793e-16	8.61583e-15
Engineered - Marine	-11.4336	2.84148e-30	9.94519e-29
Extreme - Marine	1.24461	0.213273	1
Fresh Water - Marine	0.295242	0.767809	1
Animal - Plant	-1.66842	0.0952321	1
Brackish - Plant	0.554553	0.5792	1
Built - Plant	-0.0820162	0.934634	0.934634
Engineered - Plant	-1.27794	0.201271	1
Extreme - Plant	1.43783	0.150484	1
Fresh Water - Plant	1.14347	0.252845	1
Marine - Plant	1.0916	0.275011	1
Animal - Soil	-2.77039	0.00559898	0.11198
Brackish - Soil	2.64633	0.00813693	0.146465
Built - Soil	2.6926	0.00708969	0.134704
Engineered - Soil	-1.45258	0.146341	1
Extreme - Soil	5.78487	7.25678e-09	1.88676e-07
Fresh Water - Soil	5.31194	1.08467e-07	2.71168e-06
Marine - Soil	6.74863	1.49251e-11	4.17902e-10
Plant - Soil	0.807827	0.41919	1

## Sheet: Stable4_Aromatic_Dunn
Comparison	Z	P.unadj	P.adj
Animal - Brackish	-3.6721	0.000240566	0.00673585
Animal - Built	-8.17623	2.92875e-16	1.02506e-14
Brackish - Built	0.00737284	0.994117	0.994117
Animal - Engineered	-3.01178	0.00259721	0.0675274
Brackish - Engineered	1.92108	0.0547222	1
Built - Engineered	4.41522	1.00907e-05	0.00029263
Animal - Extreme	-5.10602	3.29018e-07	1.01995e-05
Brackish - Extreme	-0.101963	0.918786	1
Built - Extreme	-0.188868	0.850197	1
Engineered - Extreme	-2.76252	0.00573577	0.131923
Animal - Fresh Water	-5.97903	2.24471e-09	7.18308e-08
Brackish - Fresh Water	-0.15538	0.876522	1
Built - Fresh Water	-0.331	0.740645	1
Engineered - Fresh Water	-3.28707	0.00101237	0.0273339
Extreme - Fresh Water	-0.0620942	0.950488	1
Animal - Marine	-11.4158	3.48799e-30	1.25568e-28
Brackish - Marine	-1.73914	0.0820098	1
Built - Marine	-6.89261	5.47761e-12	1.80761e-10
Engineered - Marine	-7.8971	2.85468e-15	9.70592e-14
Extreme - Marine	-2.35677	0.0184347	0.368694
Fresh Water - Marine	-2.81518	0.00487498	0.121874
Animal - Plant	-0.862871	0.388208	1
Brackish - Plant	1.25345	0.210041	1
Built - Plant	1.43694	0.150735	1
Engineered - Plant	0.22499	0.821987	1
Extreme - Plant	1.41577	0.156841	1
Fresh Water - Plant	1.48104	0.138597	1
Marine - Plant	2.45514	0.014083	0.295744
Animal - Soil	-4.99343	5.93152e-07	1.77946e-05
Brackish - Soil	0.0809878	0.935452	1
Built - Soil	0.134494	0.893012	1
Engineered - Soil	-2.57328	0.010074	0.221629
Extreme - Soil	0.236188	0.813287	1
Fresh Water - Soil	0.327386	0.743376	1
Marine - Soil	2.78768	0.00530862	0.127407
Plant - Soil	-1.30568	0.191662	1

## Sheet: Stable5_Carbohydrate_Dunn
Comparison	Z	P.unadj	P.adj
Animal - Brackish	-2.9293	0.00339725	0.0713422
Animal - Built	-6.205	5.46966e-10	1.6409e-08
Brackish - Built	0.701732	0.482846	1
Animal - Engineered	1.5687	0.116718	1
Brackish - Engineered	3.62353	0.000290608	0.00668399
Built - Engineered	7.58401	3.3503e-14	1.1391e-12
Animal - Extreme	-6.68793	2.26343e-11	7.24297e-10
Brackish - Extreme	-1.44759	0.14773	1
Built - Extreme	-3.65276	0.00025944	0.00622656
Engineered - Extreme	-7.57863	3.49211e-14	1.1524e-12
Animal - Fresh Water	-5.36317	8.17721e-08	2.20785e-06
Brackish - Fresh Water	-0.390084	0.696474	1
Built - Fresh Water	-1.93458	0.0530421	1
Engineered - Fresh Water	-6.35203	2.12489e-10	6.58717e-09
Extreme - Fresh Water	1.48236	0.138244	1
Animal - Marine	-9.63045	5.94703e-22	2.08146e-20
Brackish - Marine	-0.779309	0.435798	1
Built - Marine	-5.04176	4.61274e-07	1.19931e-05
Engineered - Marine	-10.7237	7.88089e-27	2.83712e-25
Extreme - Marine	1.35205	0.17636	1
Fresh Water - Marine	-0.570303	0.568472	1
Animal - Plant	-0.38201	0.702454	1
Brackish - Plant	0.987261	0.323515	1
Built - Plant	0.748866	0.453938	1
Engineered - Plant	-0.747942	0.454495	1
Extreme - Plant	1.83579	0.066389	1
Fresh Water - Plant	1.26441	0.206082	1
Marine - Plant	1.47047	0.141435	1
Animal - Soil	-0.406654	0.684262	1
Brackish - Soil	2.47484	0.0133295	0.266591
Built - Soil	3.62331	0.000290861	0.00639894
Engineered - Soil	-1.56708	0.117096	1
Extreme - Soil	5.39449	6.87203e-08	1.92417e-06
Fresh Water - Soil	4.13275	3.58453e-05	0.000896132
Marine - Soil	6.07561	1.23517e-09	3.58199e-08
Plant - Soil	0.252801	0.800422	0.800422

## Sheet: Stable6_Cofactors_Dunn
Comparison	Z	P.unadj	P.adj
Animal - Brackish	-5.58492	2.33812e-08	6.07912e-07
Animal - Built	-10.4288	1.83111e-25	6.22578e-24
Brackish - Built	1.86376	0.0623561	0.872985
Animal - Engineered	-2.13581	0.0326952	0.523123
Brackish - Engineered	4.52873	5.93387e-06	0.000136479
Built - Engineered	7.05708	1.70037e-12	4.76103e-11
Animal - Extreme	-9.42251	4.40441e-21	1.40941e-19
Brackish - Extreme	-0.744688	0.45646	1
Built - Extreme	-4.17806	2.94004e-05	0.000617409
Engineered - Extreme	-7.75663	8.72166e-15	2.52928e-13
Animal - Fresh Water	-10.0017	1.49809e-23	4.9437e-22
Brackish - Fresh Water	-0.615735	0.538069	1
Built - Fresh Water	-4.3337	1.46627e-05	0.000322579
Engineered - Fresh Water	-8.15633	3.45357e-16	1.03607e-14
Extreme - Fresh Water	0.20386	0.838463	1
Animal - Marine	-16.3724	3.00898e-60	1.08323e-58
Brackish - Marine	-0.704186	0.481317	1
Built - Marine	-8.72411	2.68284e-18	8.3168e-17
Engineered - Marine	-12.7654	2.55702e-37	8.94958e-36
Extreme - Marine	0.236435	0.813095	1
Fresh Water - Marine	-0.022777	0.981828	1
Animal - Plant	-1.88387	0.0595824	0.893736
Brackish - Plant	0.827641	0.407874	1
Built - Plant	0.00654719	0.994776	0.994776
Engineered - Plant	-1.3786	0.168018	1
Extreme - Plant	1.28359	0.199286	1
Fresh Water - Plant	1.21396	0.224761	1
Marine - Plant	1.25766	0.208516	1
Animal - Soil	-3.94931	7.8376e-05	0.00156752
Brackish - Soil	2.93415	0.00334458	0.063547
Built - Soil	2.49154	0.012719	0.228941
Engineered - Soil	-2.23269	0.0255697	0.434685
Extreme - Soil	5.02695	4.9834e-07	1.19602e-05
Fresh Water - Soil	5.12248	3.01538e-07	7.53845e-06
Marine - Soil	6.82507	8.78825e-12	2.37283e-10
Plant - Soil	0.667463	0.504477	1

## Sheet: Stable7_FattyAcids_Dunn
Comparison	Z	P.unadj	P.adj
Animal - Brackish	-3.88145	0.000103836	0.00238822
Animal - Built	-2.6115	0.00901456	0.153247
Brackish - Built	3.09	0.00200157	0.0400313
Animal - Engineered	2.634	0.00843845	0.151892
Brackish - Engineered	4.98506	6.1941e-07	1.61047e-05
Built - Engineered	5.47413	4.39657e-08	1.31897e-06
Animal - Extreme	-3.69797	0.000217331	0.00478127
Brackish - Extreme	1.36001	0.173827	1
Built - Extreme	-2.50254	0.0123305	0.197288
Engineered - Extreme	-5.35389	8.60822e-08	2.49638e-06
Animal - Fresh Water	-4.48855	7.17099e-06	0.000172104
Brackish - Fresh Water	1.12863	0.259054	1
Built - Fresh Water	-3.27822	0.00104465	0.0219376
Engineered - Fresh Water	-6.233	4.57591e-10	1.46429e-08
Extreme - Fresh Water	-0.375487	0.707298	1
Animal - Marine	-7.49311	6.7261e-14	2.28687e-12
Brackish - Marine	1.23214	0.217896	1
Built - Marine	-6.7527	1.4512e-11	4.78896e-10
Engineered - Marine	-9.7965	1.16554e-22	4.19593e-21
Extreme - Marine	-0.509595	0.610335	1
Fresh Water - Marine	-0.0368002	0.970644	0.970644
Animal - Plant	-0.0843683	0.932764	1
Brackish - Plant	1.80291	0.0714016	1
Built - Plant	0.393718	0.69379	1
Engineered - Plant	-0.712141	0.476377	1
Extreme - Plant	1.15277	0.249006	1
Fresh Water - Plant	1.31378	0.188919	1
Marine - Plant	1.3672	0.171561	1
Animal - Soil	2.89215	0.0038261	0.0726958
Brackish - Soil	5.14837	2.62761e-07	7.09454e-06
Built - Soil	4.8364	1.3221e-06	3.30526e-05
Engineered - Soil	0.844736	0.398259	1
Extreme - Soil	5.33037	9.8011e-08	2.74431e-06
Fresh Water - Soil	6.03171	1.62235e-09	5.02927e-08
Marine - Soil	8.03342	9.47916e-16	3.31771e-14
Plant - Soil	0.966366	0.333861	1

## Sheet: Stable8_Nitrogen_Dunn
Comparison	Z	P.unadj	P.adj
Animal - Built	-13.0419	7.06609e-39	2.54379e-37
Built - Engineered	9.80274	1.09571e-22	3.83499e-21
Animal - Marine	-8.38379	5.12498e-17	1.74249e-15
Animal - Fresh Water	-8.06681	7.21596e-16	2.38127e-14
Built - Marine	6.12635	8.99195e-10	2.87742e-08
Engineered - Fresh Water	-5.96764	2.40703e-09	7.46181e-08
Animal - Extreme	-5.71635	1.08838e-08	3.26513e-07
Animal - Brackish	-5.60798	2.04699e-08	5.93627e-07
Engineered - Marine	-5.23805	1.6228e-07	4.54383e-06
Animal - Soil	-4.83995	1.2987e-06	3.5065e-05
Brackish - Engineered	4.30809	1.64673e-05	0.000428149
Built - Soil	4.19001	2.78942e-05	0.000697355
Engineered - Extreme	-3.95397	7.68637e-05	0.00184473
Fresh Water - Soil	2.93518	0.00333357	0.0766722
Fresh Water - Marine	2.81506	0.00487677	0.107289
Engineered - Soil	-2.66718	0.00764913	0.152983
Animal - Engineered	-2.67323	0.00751237	0.15776
Brackish - Soil	2.57147	0.0101269	0.192411
Brackish - Marine	2.28696	0.022198	0.399564
Marine - Plant	0.119621	0.904784	0.904784
Brackish - Built	0.594248	0.552346	1
Brackish - Extreme	1.22855	0.219242	1
Built - Extreme	1.24749	0.212218	1
Brackish - Fresh Water	0.619829	0.535371	1
Built - Fresh Water	0.177397	0.859197	1
Extreme - Fresh Water	-0.901464	0.367342	1
Extreme - Marine	1.16891	0.242438	1
Animal - Plant	-1.74904	0.080284	1
Brackish - Plant	1.19132	0.23353	1
Built - Plant	1.02453	0.305584	1
Engineered - Plant	-1.03326	0.30148	1
Extreme - Plant	0.530388	0.595843	1
Fresh Water - Plant	0.940012	0.347211	1
Extreme - Soil	1.62289	0.104612	1
Marine - Soil	0.980907	0.326639	1
Plant - Soil	0.162533	0.870886	1

## Sheet: Stable9_Nucleoside_Dunn
Comparison	Z	P.unadj	P.adj
Animal - Brackish	3.60818	0.000308348	0.00801705
Animal - Built	10.5678	4.20367e-26	1.51332e-24
Brackish - Built	0.233078	0.815701	1
Animal - Engineered	3.43844	0.000585079	0.014627
Brackish - Engineered	-1.97023	0.0488115	0.878607
Built - Engineered	-5.63205	1.78084e-08	5.52061e-07
Animal - Extreme	0.336819	0.736253	1
Brackish - Extreme	-3.00065	0.00269404	0.064657
Built - Extreme	-5.70293	1.17768e-08	3.76858e-07
Engineered - Extreme	-1.9823	0.047446	0.901473
Animal - Fresh Water	2.0007	0.0454248	0.908495
Brackish - Fresh Water	-2.15601	0.0310826	0.652735
Built - Fresh Water	-4.52099	6.15517e-06	0.000172345
Engineered - Fresh Water	-0.563498	0.573096	1
Extreme - Fresh Water	1.25896	0.208045	1
Animal - Marine	2.87214	0.00407698	0.0937706
Brackish - Marine	-2.57356	0.0100658	0.221448
Built - Marine	-9.58431	9.30772e-22	3.2577e-20
Engineered - Marine	-1.24723	0.212312	1
Extreme - Marine	1.35216	0.176323	1
Fresh Water - Marine	-0.259656	0.795129	1
Animal - Plant	1.83903	0.0659112	1
Brackish - Plant	0.0329234	0.973736	0.973736
Built - Plant	-0.0771531	0.938502	1
Engineered - Plant	1.02909	0.303438	1
Extreme - Plant	1.66939	0.0950395	1
Fresh Water - Plant	1.18509	0.235984	1
Marine - Plant	1.29748	0.194467	1
Animal - Soil	7.36811	1.73064e-13	5.88417e-12
Brackish - Soil	0.812088	0.416741	1
Built - Soil	1.18402	0.236404	1
Engineered - Soil	4.57385	4.78851e-06	0.000138867
Extreme - Soil	5.32816	9.92113e-08	2.97634e-06
Fresh Water - Soil	4.30346	1.68151e-05	0.000454007
Marine - Soil	5.98189	2.20562e-09	7.27856e-08
Plant - Soil	0.39512	0.692754	1

[truncated: 7 more sheets: Stable10_NucleotideSugars_Dunn, Stable11_Phosphorus_Dunn, Stable12_Protein_Dunn, Stable13_Respiration_Dunn, Stable14_SecondaryMetabolism_Du, Stable15_Sulfur_Dunn, Stable16_MedianMOSubs]
